# Supplementary material for: Tightly coupled inhibitory and excitatory functional networks in the developing primary visual cortex
Source: PubMed Central journal article supplement (PMC8654369; doi:10.7554/elife.72456), 2021-12-08
Supplement: elife-72456-fig2-data1.pdf [file elife-72456-fig2-data1.pdf]

**Figure 2 — Table 1. GABAergic signaling has net inhibitory effect on cortical activity by P21.**

| Animal ID | Age (Postnatal) | # events |     | Event frequency              |                       | Event Amplitude       |                       |
|-----------|-----------------|----------|-----|------------------------------|-----------------------|-----------------------|-----------------------|
|           |                 | Baseline | BMI | Baseline (Hz) (median (IQR)) | BMI (Hz)              | Baseline (dF/F)       | BMI (dF/F)            |
| F0232     | 21              | 25       | 84  | 0.042 (0.021 - 0.067)        | 0.158 (0.088 - 0.192) | 0.688 (0.610 - 0.842) | 0.898 (0.709 - 1.346) |
| F0233     | 21              | 22       | 100 | 0.033 (0.017 - 0.063)        | 0.175 (0.117 - 0.2)   | 0.638 (0.577 - 0.734) | 0.784 (0.592 - 0.985) |
| F0089     | 23              | 149      | 273 | 0.033 (0.033 - 0.067)        | 0.217 (0.146 - 0.304) | 0.203 (0.140 - 0.413) | 0.871 (0.427 - 1.671) |
| F0109     | 21              | 78       | 275 | 0.016 (0.0 - 0.033)          | 0.233 (0.158 - 0.317) | 0.279 (0.221 - 0.375) | 0.618 (0.353 - 1.009) |
| Pooled    |                 | 274      | 732 | 0.033 (0.016-0.05)           | 0.2 (0.129-0.271)     | 0.374 (0.190-0.535)   | 0.974 (0.470-1.220)   |
|           |                 |          |     | p-value                      | *1.52E-23             | p-value               | *1.40E-52             |

Data are presented as medians (inter-quartile range). Wilcoxon rank-sum test, \* p<0.001
