# Supplementary material for: Tightly coupled inhibitory and excitatory functional networks in the developing primary visual cortex
Source: PubMed Central journal article supplement (PMC8654369; doi:10.7554/elife.72456), 2021-12-08
Supplement: elife-72456-transrepform1.pdf [file elife-72456-transrepform1.pdf]

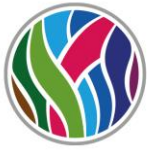

## eLife's transparent reporting form

We encourage authors to provide detailed information *within their submission* to facilitate the interpretation and replication of experiments. Authors can upload supporting documentation to indicate the use of appropriate reporting guidelines for health-related research (see [EQUATOR Network](#)), life science research (see the [BioSharing Information Resource](#)), or the [ARRIVE guidelines](#) for reporting work involving animal research. Where applicable, authors should refer to any relevant reporting standards documents in this form.

If you have any questions, please consult our Journal Policies and/or contact us: [editorial@elifesciences.org](mailto:editorial@elifesciences.org).

### Sample-size estimation

- You should state whether an appropriate sample size was computed when the study was being designed
- You should state the statistical method of sample size computation and any required assumptions
- If no explicit power analysis was used, you should describe how you decided what sample (replicate) size (number) to use

Please outline where this information can be found within the submission (e.g., sections or figure legends), or explain why this information doesn't apply to your submission:

No statistical methods were used to predetermine sample sizes, but our sample sizes are similar to those reported in previous publications (Chapman and Stryker 1993; Wilson *et al.*, 2017; Popovic *et al.*, 2018; Smith *et al.*, 2018)

### Replicates

- You should report how often each experiment was performed
- You should include a definition of biological versus technical replication
- The data obtained should be provided and sufficient information should be provided to indicate the number of independent biological and/or technical replicates
- If you encountered any outliers, you should describe how these were handled
- Criteria for exclusion/inclusion of data should be clearly stated
- High-throughput sequence data should be uploaded before submission, with a private link for reviewers provided (these are available from both GEO and ArrayExpress)

Please outline where this information can be found within the submission (e.g., sections or figure legends), or explain why this information doesn't apply to your submission:

For comparing spontaneous correlation networks (Figure 2), experiments were repeated across 7 animals per group. For comparing similarity of inhibitory and excitatory spontaneous activity within the same animal (Figure 3), data was collected across 3 animals. Simultaneous imaging of inhibitory and excitatory spontaneous activity on the cellular level (Figure 4) was conducted across 5 animals. For widefield epifluorescent data, animals with fewer than 30 detected events were excluded (see Methods: Event Detection).

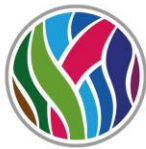

### Statistical reporting

- Statistical analysis methods should be described and justified
- Raw data should be presented in figures whenever informative to do so (typically when N per group is less than 10)
- For each experiment, you should identify the statistical tests used, exact values of N, definitions of center, methods of multiple test correction, and dispersion and precision measures (e.g., mean, median, SD, SEM, confidence intervals; and, for the major substantive results, a measure of effect size (e.g., Pearson's r, Cohen's d)
- Report exact p-values wherever possible alongside the summary statistics and 95% confidence intervals. These should be reported for all key questions and not only when the p-value is less than 0.05.

Please outline where this information can be found within the submission (e.g., sections or figure legends), or explain why this information doesn't apply to your submission:

Details on statistical reporting can be found under 'Quantification and Statistical Analysis' in the Methods. Nonparametric tests were used for statistical testing throughout the study, and summary statistics and p-values are reported in the Results. Details on surrogate dataset generation to estimate null distributions are outlined in appropriate Methods sections (see 'Strength of long-distance correlations' and 'Comparison of inhibitory and excitatory correlation similarity').

(For large datasets, or papers with a very large number of statistical tests, you may upload a single table file with tests, Ns, etc., with reference to sections in the manuscript.)

### Group allocation

- Indicate how samples were allocated into experimental groups (in the case of clinical studies, please specify allocation to treatment method); if randomization was used, please also state if restricted randomization was applied
- Indicate if masking was used during group allocation, data collection and/or data analysis

Please outline where this information can be found within the submission (e.g., sections or figure legends), or explain why this information doesn't apply to your submission:

No specific method was used to randomize experimental groups. Animals were assigned a given virus at time of injection. Experimenters were not masked to group allocation during data collection or analysis.

### Additional data files ("source data")

- We encourage you to upload relevant additional data files, such as numerical data that are represented as a graph in a figure, or as a summary table
- Where provided, these should be in the most useful format, and they can be uploaded as "Source data" files linked to a main figure or table
- Include model definition files including the full list of parameters used
- Include code used for data analysis (e.g., R, MatLab)
- Avoid stating that data files are "available upon request"

Please indicate the figures or tables for which source data files have been provided:

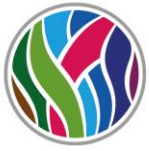

eLIFE

1st Floor  
24 Hills Road  
Cambridge CB2 1JP, UK

P 01223 855340  
W [elifesciences.org](http://elifesciences.org)  
T @elife

Source data has been provided for Figure 2. Additional source data and code (Python, MATLAB) used in this work are accessible at <https://github.com/mulho042/SpontaneousInhib.git>
